# Supplementary material for: Value of repeat renal biopsy in the evaluation of AL amyloidosis patients lacking renal response despite of complete hematologic remission: a case report and literature review
Source: Springer Nature journal article supplement (doi:10.1186/s12882-022-02752-4), 2022-03-31
Supplement: MOESM1 [file 20272104]

A

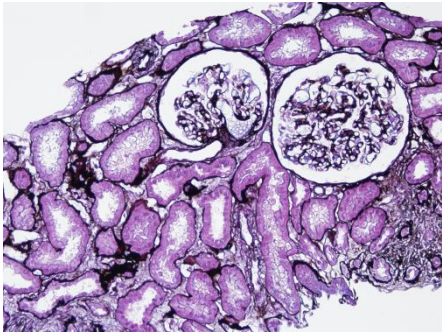

Masson+PASM

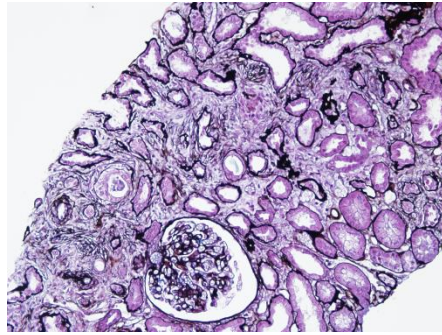

Masson+PASM

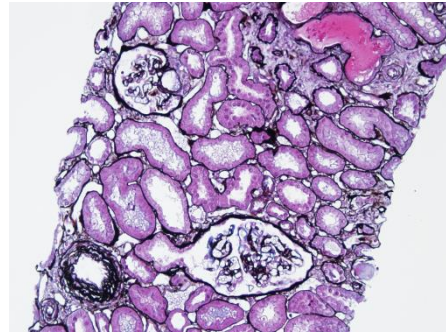

Masson+PASM

B

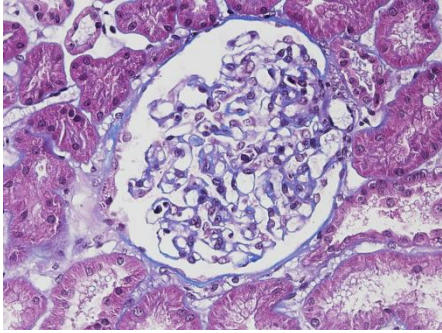

Masson

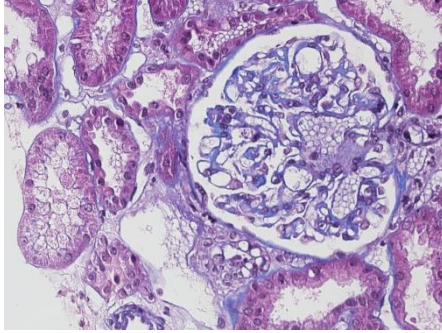

Masson

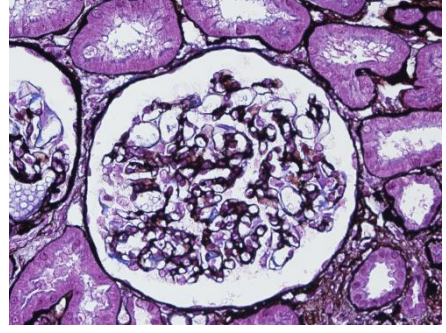

Masson+PASM

C

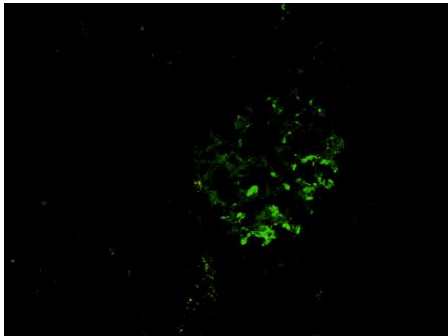

IF - λ

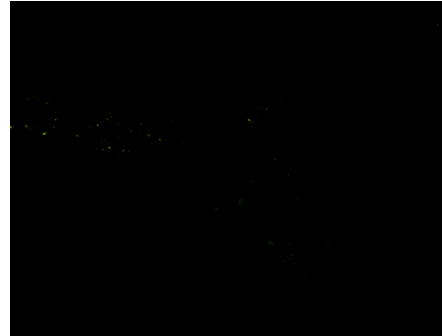

IF - κ

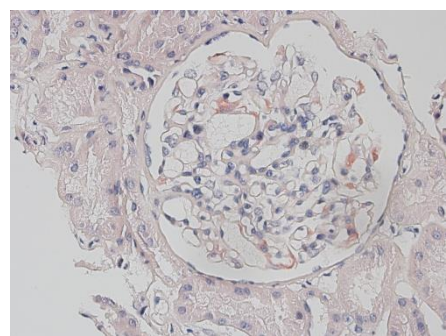

Congo Red

D

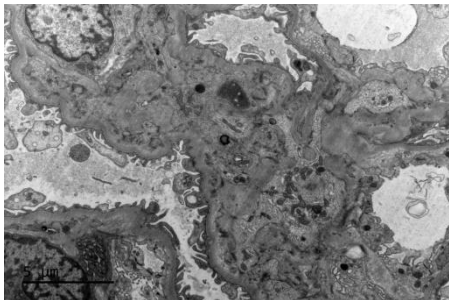

EM

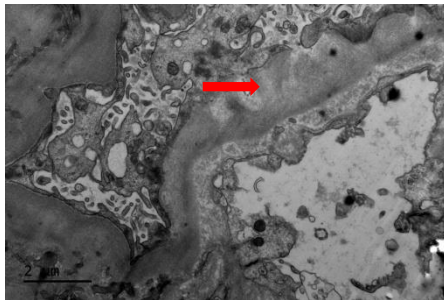

EM

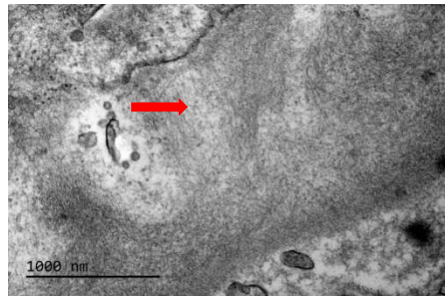

EM
