# Supplementary material for: Value of repeat renal biopsy in the evaluation of AL amyloidosis patients lacking renal response despite of complete hematologic remission: a case report and literature review
Source: Springer Nature journal article supplement (doi:10.1186/s12882-022-02752-4), 2022-03-31
Supplement: MOESM3 [file 20272104]

A

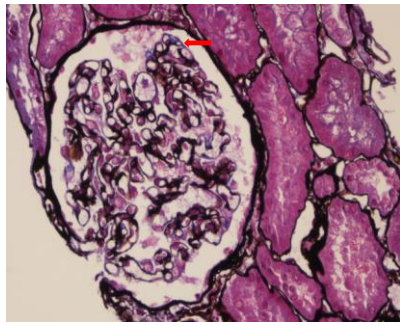

M=1, CW=0

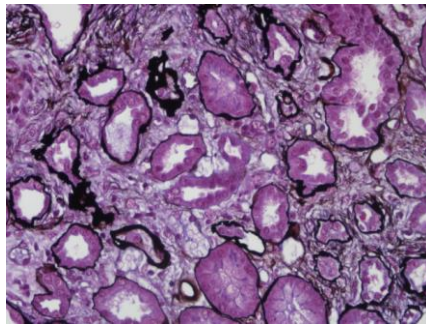

I=0

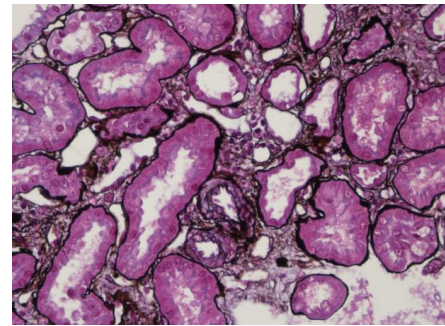

V=0

B

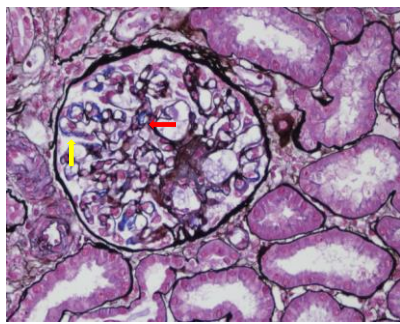

M=1, CW=1

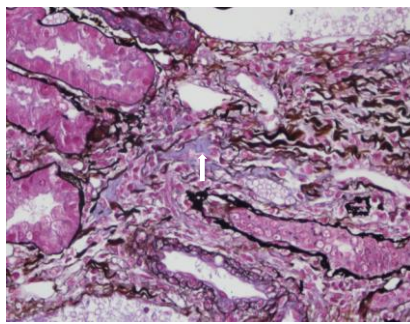

I=1

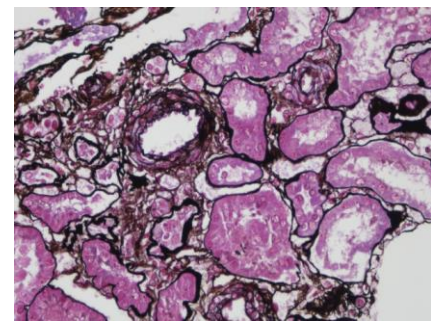

V=0
